# Supplementary material
Source: publisher site journal article supplement (https://www.spandidos-publications.com/4942/downloadSupplementary)
Supplement: Supplementary file 1 [file downloadSupplementary]

## Sheet: sheet1
Table SIII. Liquid biopsy techniques and parameters.
Sample type	Detection method	Paremeters	Case numbers		Parameter values		Cutoff	AUC	Sensitivity	Specificity	PPV	NPV	Accuracy	First author (Ref.)a	Published year
			CNSL (PCNSL)	Non-CNSL (HGG)	PCNSL	HGG
CSF	ELISA	CXCL13	54 (32)	101 (9)	499.00 (8.00-18,292.00) pg/ml	0.00 (0.00-4789.00) pg/mlb	80.00 pg/mlc	0.948c	91%c	90%c	NA	NA	NA	Masouris et al (75)	2021
			32 (25)	72 (21)	Increased	No change	NA	0.961c	97%c	94%c	89%c	99%c	95%c	Maeyama et al (72)	2020
		IL-10			Increased	No change	NA	0.948c
		sIL-2R			Increased	No change	NA	0.900c
	LATIA	β2-MG			Increased	No change	NA	0.948c
	ELISA	CXCL13	43 (38)	44 (14)	2960.49 pg/mlc	72.54 pg/mlc	NA	0.832c	77%c	91%c	89%c	80%c	84%c	Mabray et al (94)	2016
		IL-10			557.48 pg/mlc	5.93 pg/mlc	NA	0.792c	63%c	95%c	93%c	72%c	79%c
	SRM	APOC2	28 (28)	10 (7)	16.84 fmol/μg	5.19 fmol/μgc	8.30 fmol/μgc	0.906c	85%c	78%c	NA	NA	NA	Waldera-Lupa et al (71)	2020
		GPNMB			0.55 fmol/μg	0.23 fmol/μgc	0.32 fmol/μgc	0.846c	69%c	89%c	NA	NA	NA
		VSIG4			104.10 fmol/μg	19.18 fmol/μgc	36.20 fmol/μgc	0.839c	71%c	90%c	NA	NA	NA
	Nested PCR	TERTp mutation	0 (0)	38 (38)	\	0.921	NA	NA	0.92	1	NA	NA	NA	Juratli et al (78)	2018
	ddPCR	MYD88 L265P mutation	11 (11)d	20 (3)d	0.73	0	NA	NA	NA	NA	NA	NA	NA	Hiemcke-Jiwa et al (80)	2019
	TaqMan-based PCR		36 (36)	106 (10)	0.72	0	NA	0.960c	94%c	98%c	NA	NA	NA	Ferreri et al (81)	2021
	ELISA	IL-10			70.00 pg/ml	0.00 pg/ml	2.00 pg/mlc				NA	NA	NA
	Flow cytometry	\	30 (30)	0 (0)	\	\	\	NA	0.23	NA	NA	NA	NA	Schroers et al (65)	2010
	Cytospin	\	30 (30)	0 (0)	\	\	\	NA	0.13	NA	NA	NA	NA
	RT‑qPCR	miR-15b	23 (23)	40 (7)	No change	Increased	REL=0.40c	0.960c	90%c	95%c	NA	NA	NA	Baraniskin et al (66)	2012
		miR-21			Increased	No change	REL=8.00c	NA	NA	NA	NA	NA	NA
	Methylation‑specific PCR	MGMT promoter methylation	0 (0)	28 (28)	\	0.642857	\	NA	0.642857	NA	NA	NA	NA	Wang et al (77)	2015
Serum			0 (0)	30 (30)	\	0.4	\	NA	0.4	NA	NA	NA	NA
	ddPCR	RNU6-1	12 (12)	18 (18)	8.03 copies/μle	27.31 copies/μle	NA	0.7	NA	NA	NA	NA	NA	Puigdelloses et al (92)	2020
Plasma	Nested PCR	TERTp mutation	0 (0)	38 (38)	\	0.079	\	NA	0.08	NA	NA	NA	NA	Juratli et al (78)	2018
	RT‑qPCR	miR-21	25 (25)	25 (25)	Increased	No change	NA	0.862	NA	NA	NA	NA	NA	Yang et al (87)	2019
	TAM-MSP	cg0504	15 (15)	3 (3)	0.53	66.67%	NA	NA	NA	NA	NA	NA	NA	Downs at al (82)	2021
		SCG3	15 (15)	3 (3)	0.27	0	NA	NA	NA	NA	NA	NA	NA
aReferences are included in the manuscript. bValue of 24 primary brain tumors. cValue of CNSL vs non-CNSL. dSample number. eREL of the miRNAs (y-axis) are normalized to miR-24. ELISA, enzyme-linked immunosorbent assay; LATIA, latex agglutination turbidimetric immunoassay; SRM, selected reaction monitoring; TAM-MSP, tailed amplicon multiplexed-methylation-specific PCR; RT-qPCR, reverse transcripti…
